# Supplementary material for: Selective one-pot syntheses of PtII–CuI heterobimetallic complexes of 4,5-diazafluorenide derivatives
Source: Royal Society of Chemistry journal article supplement (doi:10.1039/c3dt52135d), 2013-01-01
Supplement: c3dt52135d.pdf [file c3dt52135d.pdf]

## Supplementary Information

# Selective One-Pot Syntheses of Pt<sup>II</sup>-Cu<sup>I</sup> Heterobimetallic Complexes of 4,5-Diazafluorenone Derivatives

Rhys Batcup, Frederick Sin Nang Chiu, Vincent T. Annibale, Jung-Eun Ustina Huh, Runyu Tan, and Datong Song\*

*Davenport Chemical Research Laboratories, Department of Chemistry, University of Toronto, Toronto, Ontario, Canada, M5S 3H6*

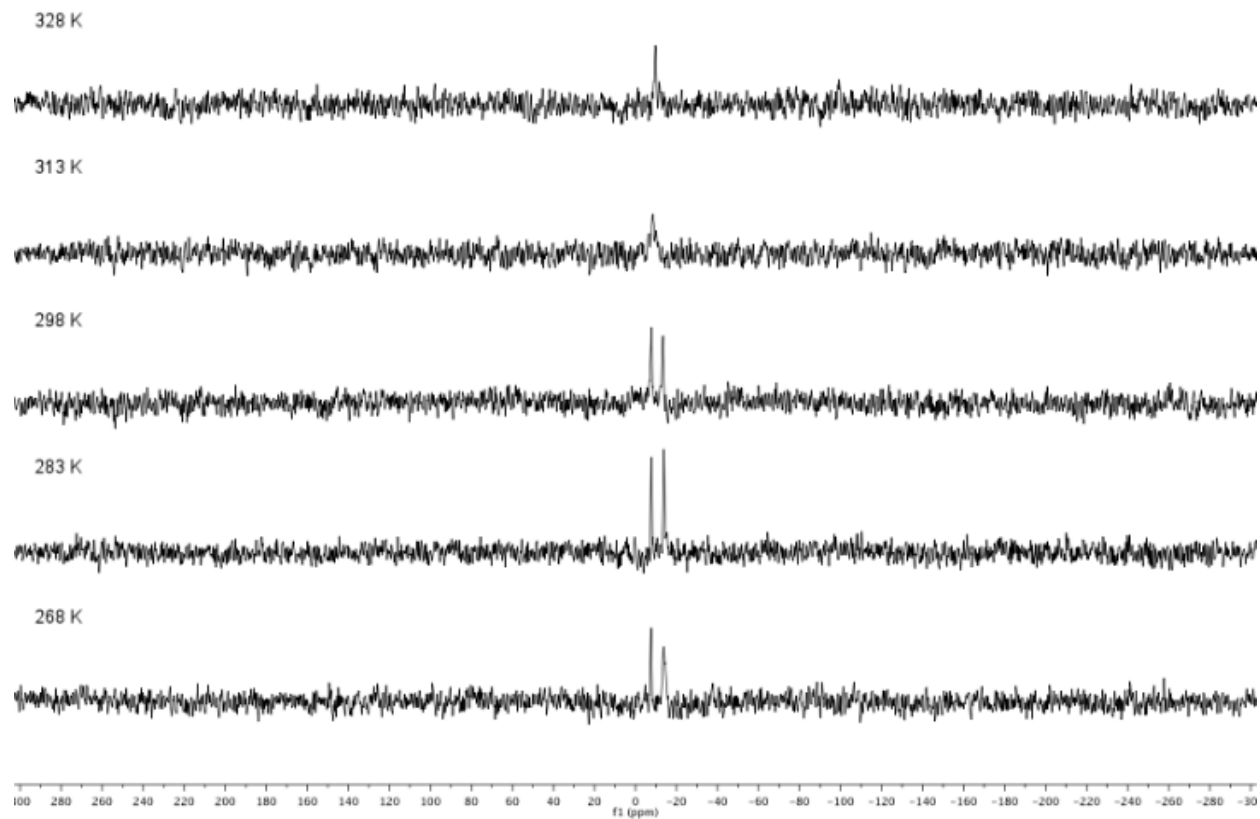

**Figure 1S.** Variable temperature  $^{31}\text{P}$  NMR spectra of **1b**.

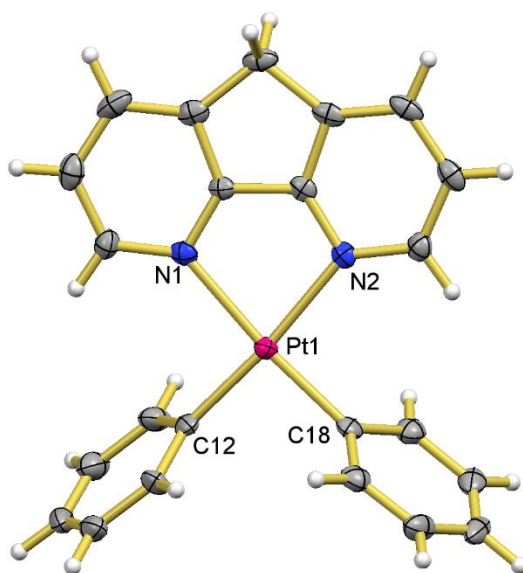

**Figure 2S.** Molecular structure of  $[\text{PtPh}_2(\text{LH})]$ . Thermal ellipsoids are drawn at 50% probability.

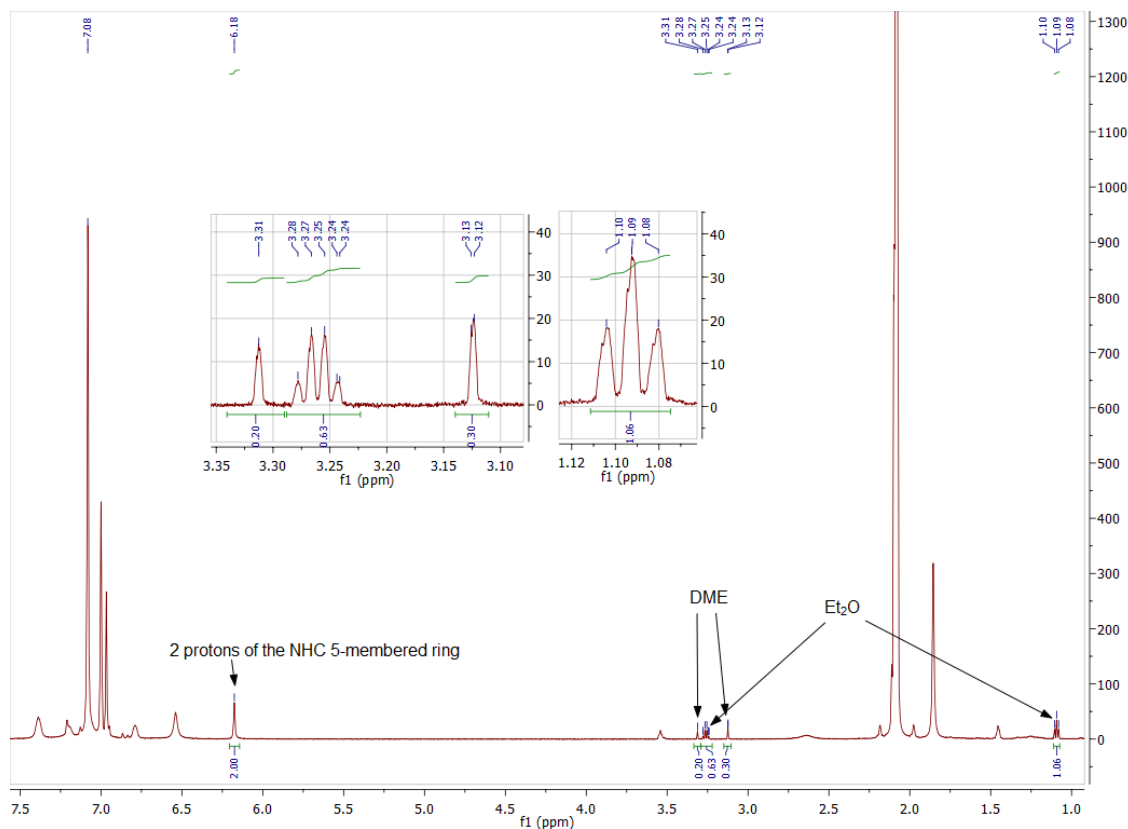

**Figure 3S.** The  $^1\text{H}$  NMR spectrum of the EA sample of **1b** in toluene- $d_8$  at  $40^\circ\text{C}$ , showing the residual solvents in the EA sample after 12 hours of drying under vacuum.
